# Supplementary material for: Augmented Chondroitin Sulfate Proteoglycan Has Therapeutic Potential for Intervertebral Disc Degeneration by Stimulating Anabolic Turnover in Bovine Nucleus Pulposus Cells under Changes in Hydrostatic Pressure
Source: MDPI journal article supplement (doi:10.3390/ijms22116015), 2021-06-02
Supplement: s1 [file s1]

**Table S1.** List of the antibodies, reagents, and instruments used.

| Product                                                                                                                                                                                                                                                                                                                              | Catalog number        | Manufacturer                              |
|--------------------------------------------------------------------------------------------------------------------------------------------------------------------------------------------------------------------------------------------------------------------------------------------------------------------------------------|-----------------------|-------------------------------------------|
| <i>Antibody</i>                                                                                                                                                                                                                                                                                                                      |                       |                                           |
| Keratan sulfate (mouse, monoclonal)                                                                                                                                                                                                                                                                                                  | sc-73518              | Santa Cruz Biotechnology (Santa Cruz, CA) |
| MMP13 (rabbit, polyclonal)                                                                                                                                                                                                                                                                                                           | LS-B3168              | LifeSpan BioSciences, Inc. (Seattle, WA)  |
| TRPV4 (rabbit polyclonal)                                                                                                                                                                                                                                                                                                            | LS-A8583              | LifeSpan BioSciences, Inc. (Seattle, WA)  |
| <i>Cell culture</i>                                                                                                                                                                                                                                                                                                                  |                       |                                           |
| DMEM                                                                                                                                                                                                                                                                                                                                 | 11965092              | Gibco (Waltham, MA)                       |
| Ham's F12                                                                                                                                                                                                                                                                                                                            | 11765054              | Gibco (Waltham, MA)                       |
| FBS                                                                                                                                                                                                                                                                                                                                  | 10437028              | Gibco (Waltham, MA)                       |
| Penicillin/streptomycin                                                                                                                                                                                                                                                                                                              | 15140122              | Gibco (Waltham, MA)                       |
| ITS                                                                                                                                                                                                                                                                                                                                  | 41400045              | Gibco (Waltham, MA)                       |
| D-PBS                                                                                                                                                                                                                                                                                                                                | 14190144              | Gibco (Waltham, MA)                       |
| Collagenase type 1                                                                                                                                                                                                                                                                                                                   | LS004196              | Worthington Biochemical (Lakewood, NJ)    |
| Hollow fiber tubing                                                                                                                                                                                                                                                                                                                  | S9320101,<br>S9320102 | Repligen (Waltham, MA)                    |
| Pure ethyl alcohol                                                                                                                                                                                                                                                                                                                   | 459836                | Sigma-Aldrich (St. Louis, MO)             |
| MICRO-OSMETTE™ osmometer                                                                                                                                                                                                                                                                                                             | 5004                  | Precision Systems, Inc. (Natick, MA)      |
| Pressure/perfusion culture system                                                                                                                                                                                                                                                                                                    |                       | Purpose (Shizuoka, Japan)                 |
| Aggrecan from bovine articular cartilage                                                                                                                                                                                                                                                                                             | A1960                 | Sigma-Aldrich (St. Louis, MO)             |
| HyStem® Cell culture scaffold kit                                                                                                                                                                                                                                                                                                    | HYS020                | Sigma-Aldrich (St. Louis, MO)             |
| <i>Staining</i>                                                                                                                                                                                                                                                                                                                      |                       |                                           |
| VECTASTAIN® Elite ABC-HRP kit                                                                                                                                                                                                                                                                                                        | PK6200                | Vector Laboratory (Burlingame, CA)        |
| DAB substrate kit                                                                                                                                                                                                                                                                                                                    | SK4100                | Vector Laboratory (Burlingame, CA)        |
| Harris's hematoxylin                                                                                                                                                                                                                                                                                                                 | HHS16                 | Sigma-Aldrich (St. Louis, MO)             |
| Contrast Red                                                                                                                                                                                                                                                                                                                         | 5540-0001             | Sera care (Milford, MA)                   |
| <i>Real-time RT-PCR</i>                                                                                                                                                                                                                                                                                                              |                       |                                           |
| RNeasy mini kit                                                                                                                                                                                                                                                                                                                      | 74104                 | Qiagen (Hilden, Germany)                  |
| High-Capacity cDNA Reverse Transcription Kit                                                                                                                                                                                                                                                                                         | 4368814               | Applied Biosystems (Foster City, CA)      |
| TaqMan™ gene expression master mix                                                                                                                                                                                                                                                                                                   | 4369016               | Applied Biosystems (Foster City, CA)      |
| Pre-designed PCR primers                                                                                                                                                                                                                                                                                                             |                       | Life Technologies (Carlsbad, CA)          |
| QuantStudio 5 Real-Time PCR System                                                                                                                                                                                                                                                                                                   | A28140                | Applied Biosystems (Foster City, CA)      |
| DAB = 3,3'-diaminobenzidine; DMEM = Dulbecco's modified Eagle's medium; D-PBS = Dulbecco's phosphate-buffered saline; FBS = fetal bovine serum; ITS = insulin-transferrin-selenium; MMP13 = matrix metalloproteinase 13; RT-PCR = reverse transcription-polymerase chain reaction; TRPV4 = transient receptor potential vanilloid-4. |                       |                                           |
